# Supplementary material for: Multiple regulatory mechanisms of the biological function of NRF3 (NFE2L3) control cancer cell proliferation
Source: PubMed Central journal article supplement (PMC5624902; doi:10.1038/s41598-017-12675-y), 2017-10-02
Supplement: 41598_2017_12675_MOESM1_ESM.pdf [file 41598_2017_12675_MOESM1_ESM.pdf]

## Supplementary information

### **Multiple regulatory mechanisms of the biological function of NRF3 (NFE2L3) control cancer cell proliferation**

A M Masudul Azad Chowdhury<sup>1</sup>, Hiroki Katoh<sup>1</sup>, Atsushi Hatanaka<sup>1</sup>,  
Hiroko Iwanari<sup>2</sup>, Nanami Nakamura<sup>1</sup>, Takao Hamakubo<sup>2</sup>, Tohru Natsume<sup>3</sup>,  
Tsuyoshi Waku<sup>1</sup>, Akira Kobayashi<sup>1\*</sup>

<sup>1</sup>Laboratory for Genetic Code, Graduate School of Life and Medical Sciences, Doshisha University, Kyotanabe, Kyoto, Japan, <sup>2</sup>Department of Quantitative Biology and Medicine, Research Center for Advanced Science and Technology, The University of Tokyo, Tokyo, Japan, <sup>3</sup>National Institutes of Advanced Industrial Science and Technology, Biological Information Research Center (JBIRC), Tokyo, Japan.

Address correspondence to:

Akira Kobayashi

Laboratory for Genetic Code, Graduate School of Life and Medical Sciences,  
Doshisha University, 1-3 Tatara Miyakodani, Kyotanabe 610-0394, Japan

Phone: +81-774-65-6273, Fax +81-774-65-6274

E-mail: akobayas@mail.doshisha.ac.jp

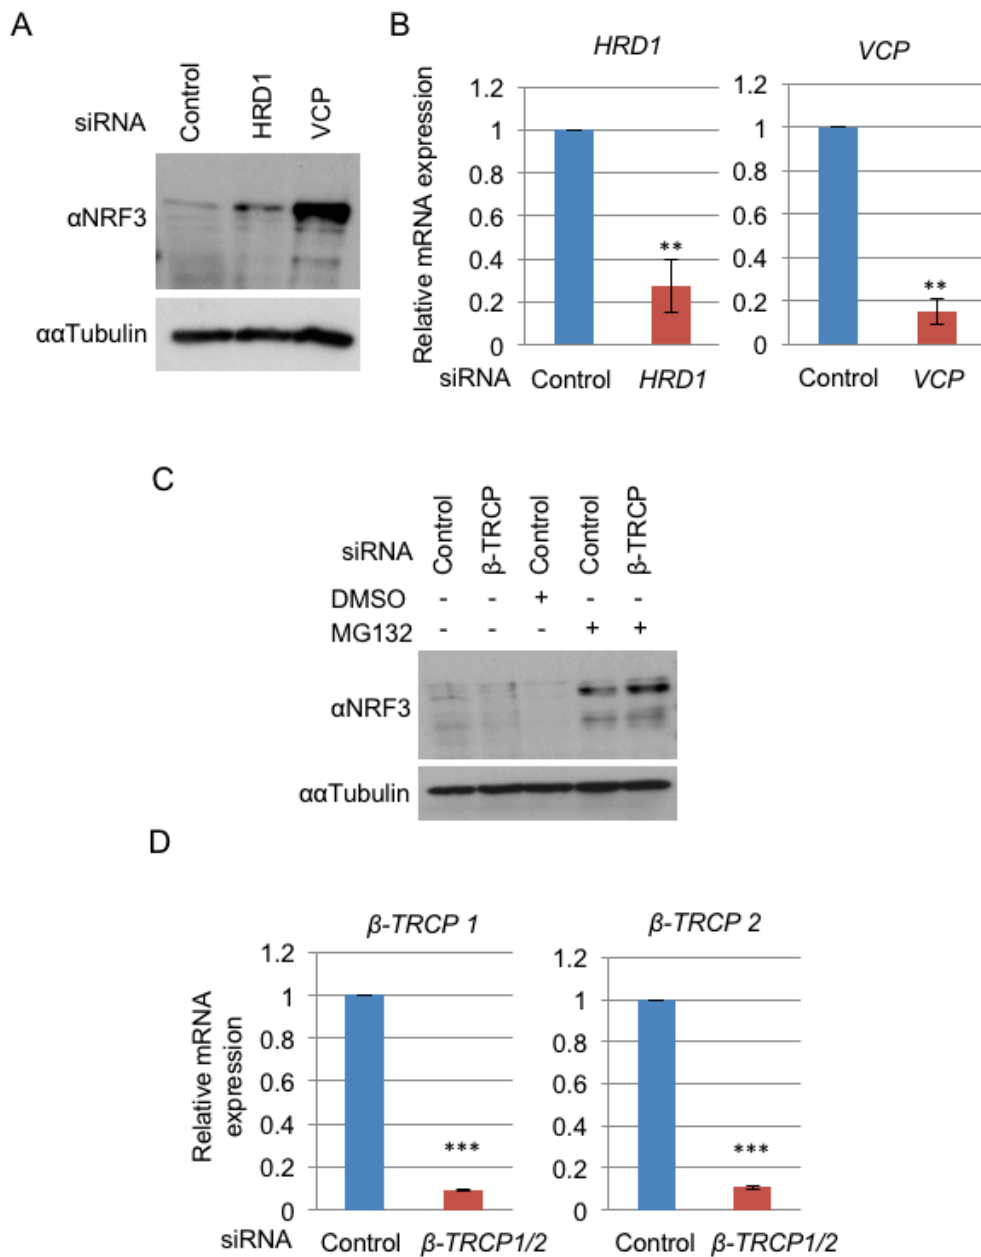

**Figure S1.** HRD1 and  $\beta$ -TRCP also regulate the NRF3 degradation in HCT116 cells. (A and B) *VCP* and *HRD1* siRNA stabilized the endogenous NRF3 in HCT116 cells (A). The knockdown efficiency of *HRD1* and *VCP* siRNA was determined using qRT-PCR analysis (B). The values were normalized to  $\beta$ -actin data. These experiments were performed as described in the legend of Figures 1. (C and D)  $\beta$ -TRCP promotes the degradation of the endogenous NRF3 in HCT116 cells (C). The knockdown efficiencies of  $\beta$ -TRCP1 and  $\beta$ -TRCP2 siRNA were determined using qRT-PCR analysis (D). The values were normalized to  $\beta$ -actin data. These experiments were performed as described in the legend of Figures 3. The two-tailed Student's t-test was used for the statistical analysis. \*\*  $P < 0.01$  and \*\*\*  $P < 0.001$  compared to the Control data.

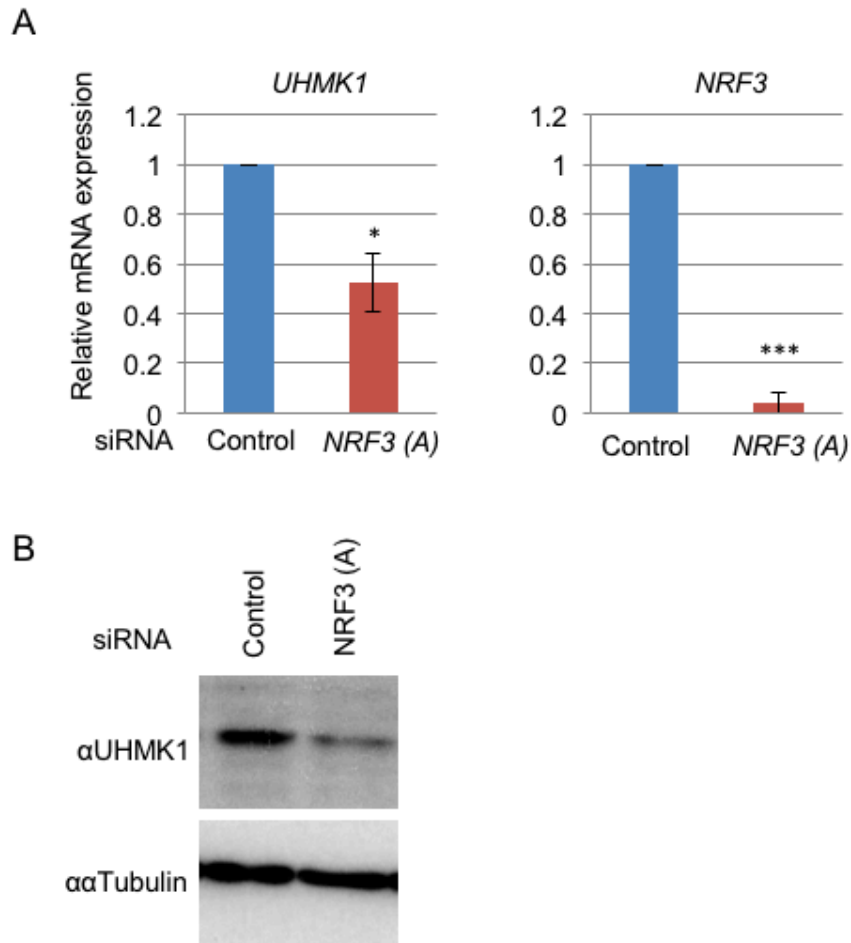

**Figure S2.** Additional NRF3 siRNA also reduces the UHMK1 expression in DLD-1 cells. (A and B) The effects of additional *NRF3* siRNA (NRF3 (A)) on the mRNA and protein expression levels were determined by qRT-PCR and immunoblot analyses, respectively. The detailed experimental procedure was described in the legend of Figures 5. The error bars (A) represent data from three independent experiments (mean  $\pm$  standard deviation). The two-tailed Student's t-test was used for the statistical analysis. \* $P < 0.05$  and \*\*\* $P < 0.001$  compared to the Control data.

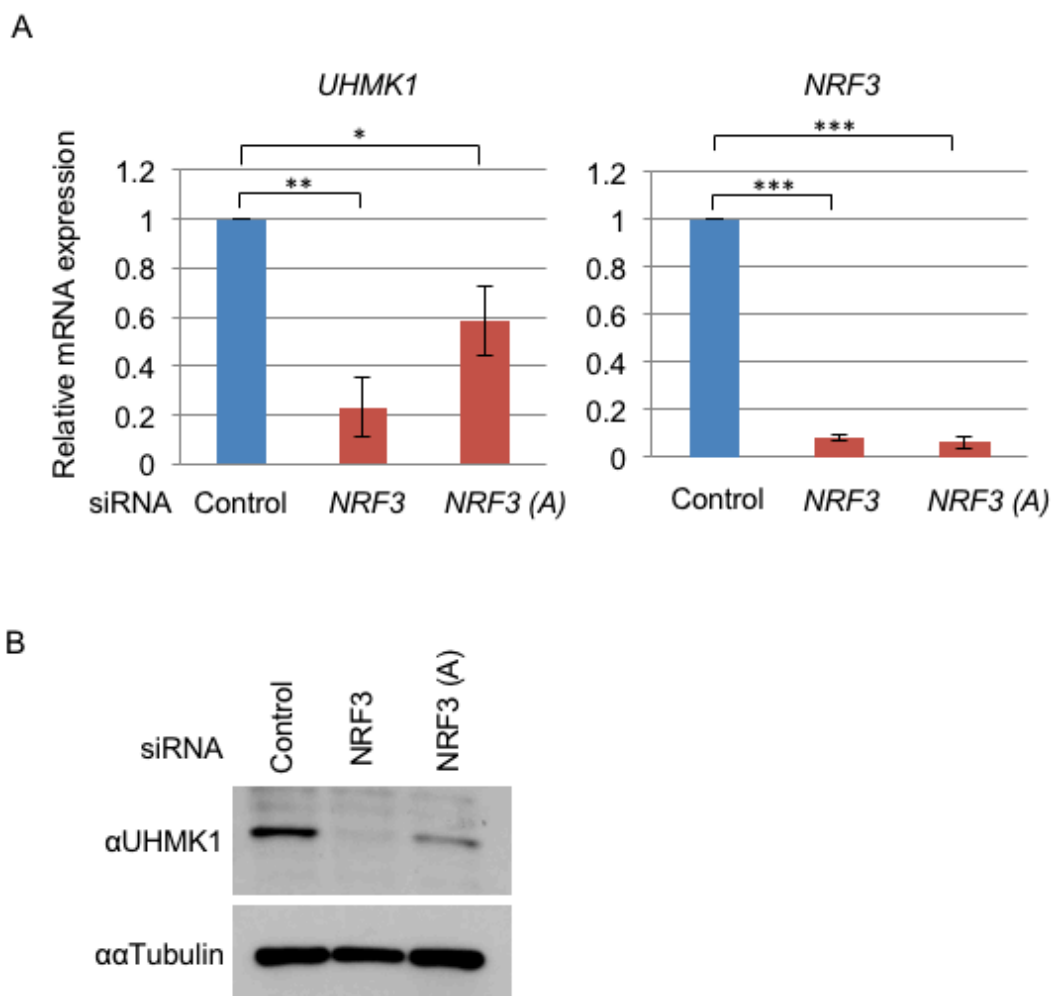

**Figure S3.** NRF3 also regulates the expression of *UHMK1* in HCT116 cell. (A and B) Reduction of the NRF3-mediated *UHMK1* expression was observed by introducing two distinct *NRF3* siRNAs into HCT116 cells. The mRNA and protein expression levels of *UHMK1* were determined by qRT-PCR and immunoblot analyses, respectively. The detailed experimental procedure was described in the legend of Figures 5. The error bars (A) represent data from three independent experiments (mean  $\pm$  standard deviation). The two-tailed Student's t-test was used for the statistical analysis. \*  $P < 0.05$ , \*\*  $P < 0.01$  and \*\*\*  $P < 0.001$  compared to the Control data.

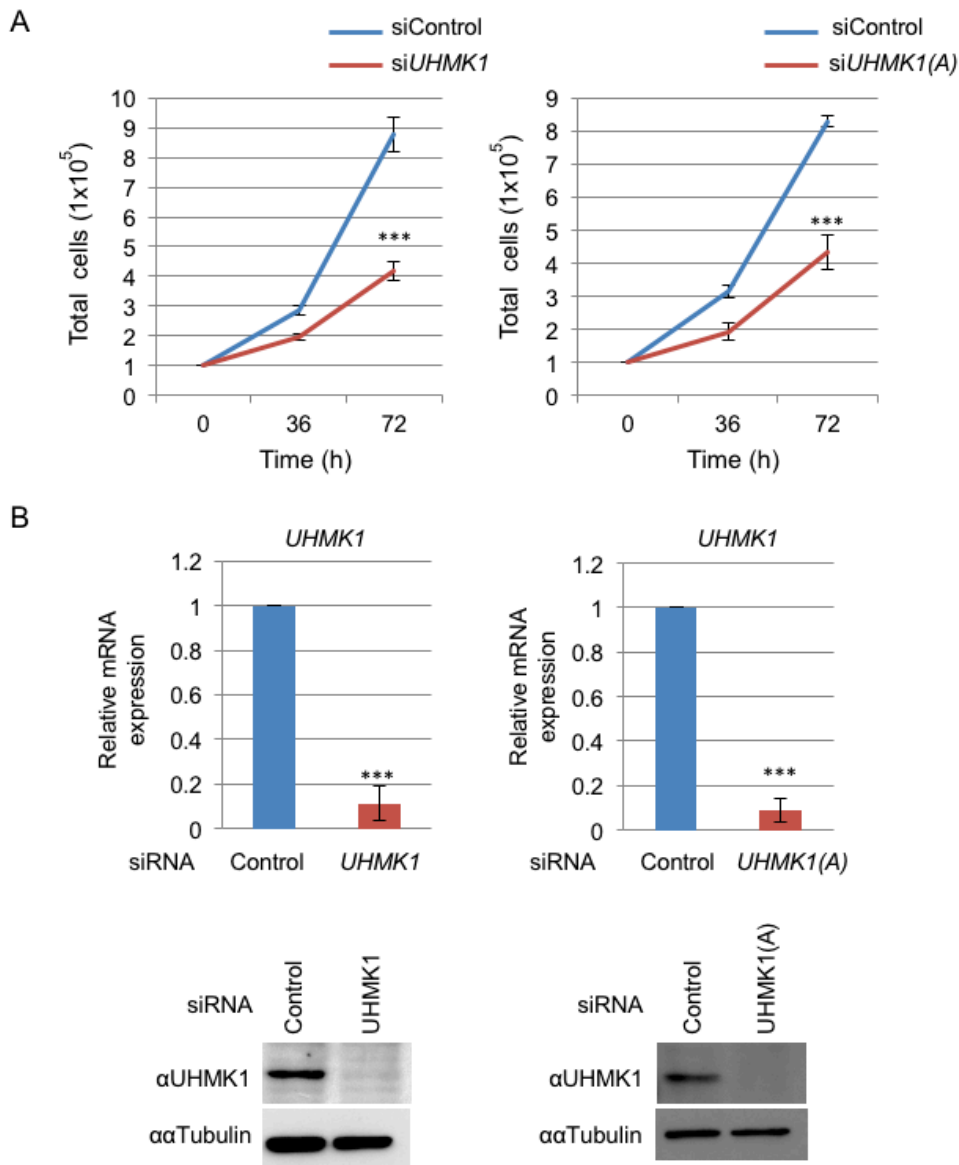

**Figure S4. UHMK1 promotes the proliferation of colon cancer cells.** (A) *UHMK1* knockdown significantly reduced the proliferation of DLD-1 cells. The cells were transfected with Control, *UHMK1* or *UHMK1(A)* siRNA. At 36 and 72 hr after transfection, the cell numbers were counted using a hemocytometer. The initial cell numbers at the time of transfection were  $1 \times 10^5$ . (B) *UHMK1* siRNAs significantly reduces mRNA and protein levels of UHMK1 in DLD-1 cells. At 48 hr after transfection with Control, *UHMK1* or *UHMK1(A)* siRNA, the mRNA expression levels of *UHMK1* was determined by qRT-PCR analysis. The values were normalized to 18S rRNA data (top). Immunoblotting of the whole-cell extracts with the anti-UHMK1 antibodies was performed (bottom).  $\alpha$ -Tubulin was used as an internal control. The error bars (A, B) represent data from two independent experiments in duplicate ( $n=4$ , mean  $\pm$  standard deviation). The two-tailed Student's t-test was used for the statistical analysis. \*\*\*  $P < 0.001$  (A, B) compared to the Control data.

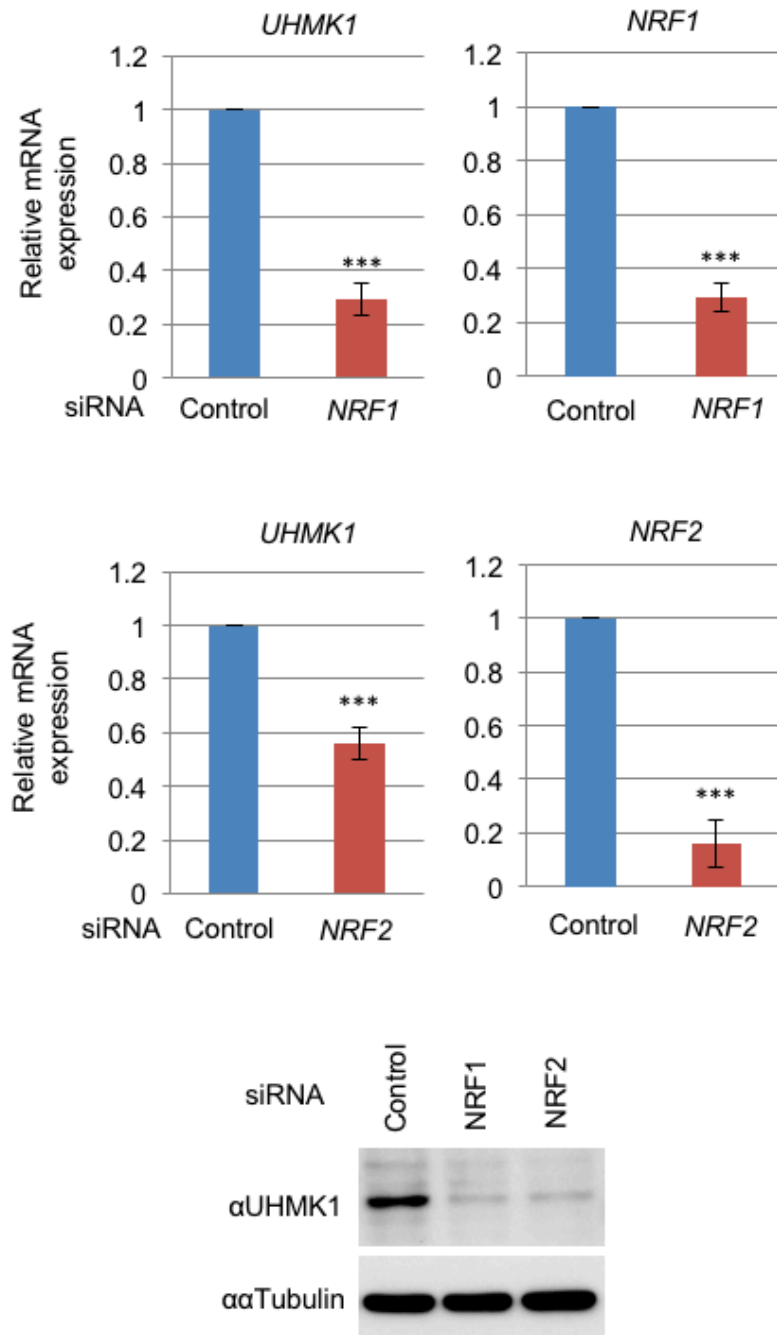

**Figure S5.** NRF1 and NRF2 also regulate the *UHMK1* gene expression. *NRF1* or *NRF2* knockdown significantly reduce mRNA and protein levels of UHMK1 in DLD-1 cells. At 48 hr after transfection with Control, *NRF1* or *NRF2* siRNA, the mRNA expression levels of *UHMK1*, *NRF1* and *NRF2* were determined by qRT-PCR analysis. The values were normalized to 18S rRNA data (top). Immunoblotting of the whole-cell extracts with the anti-UHMK1 antibodies was performed (bottom).  $\alpha$ -Tubulin was used as an internal control. The error bars represent data from two independent experiments in duplicate ( $n=4$ , mean  $\pm$  standard deviation). The two-tailed Student's t-test was used for the statistical analysis. \*\*\*  $P < 0.001$  compared to the Control data.

A

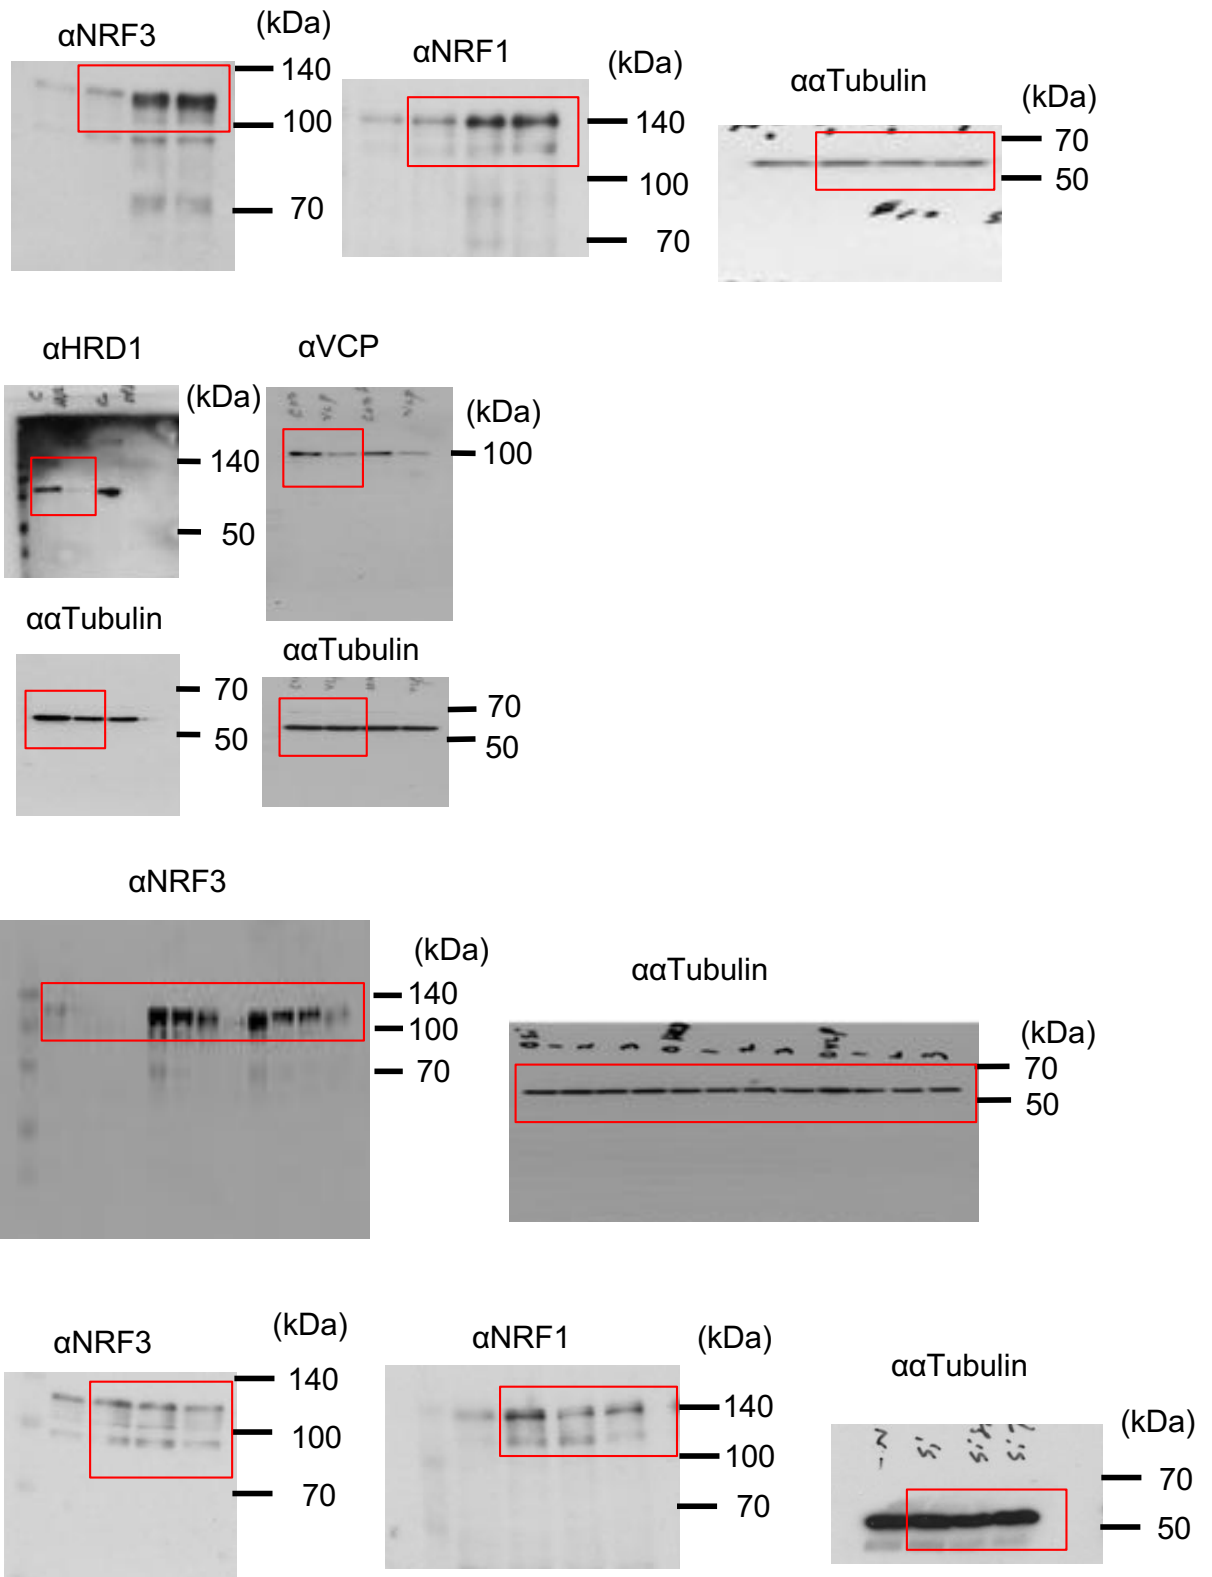

**Figure S6** (A) Full-length western blots for figure 1 A, C, D and E. The line box regions are the cropped portion of the blot shown in the main figure.

B

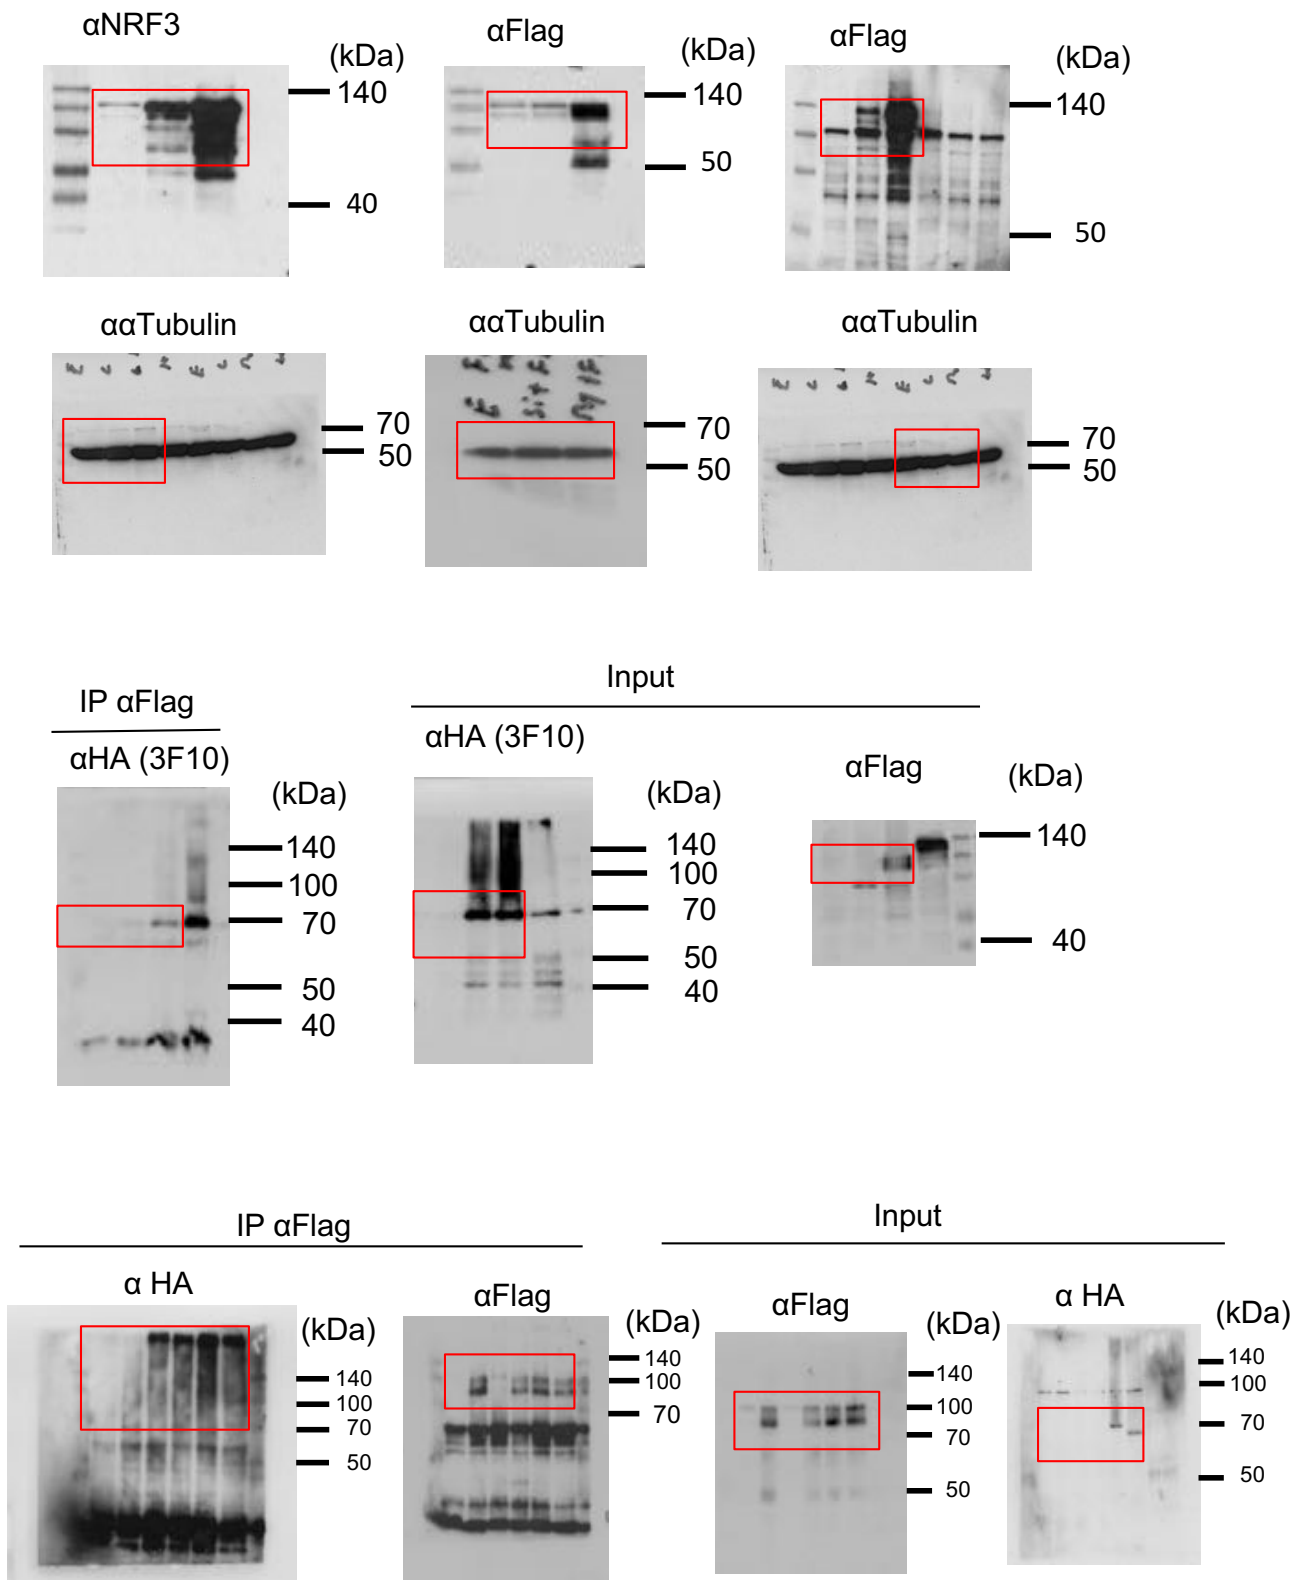

**Figure S6 (B)** Full-length western blots for figure 2A, C and D. The line box regions are the cropped portion of the blot shown in the main figure.



C

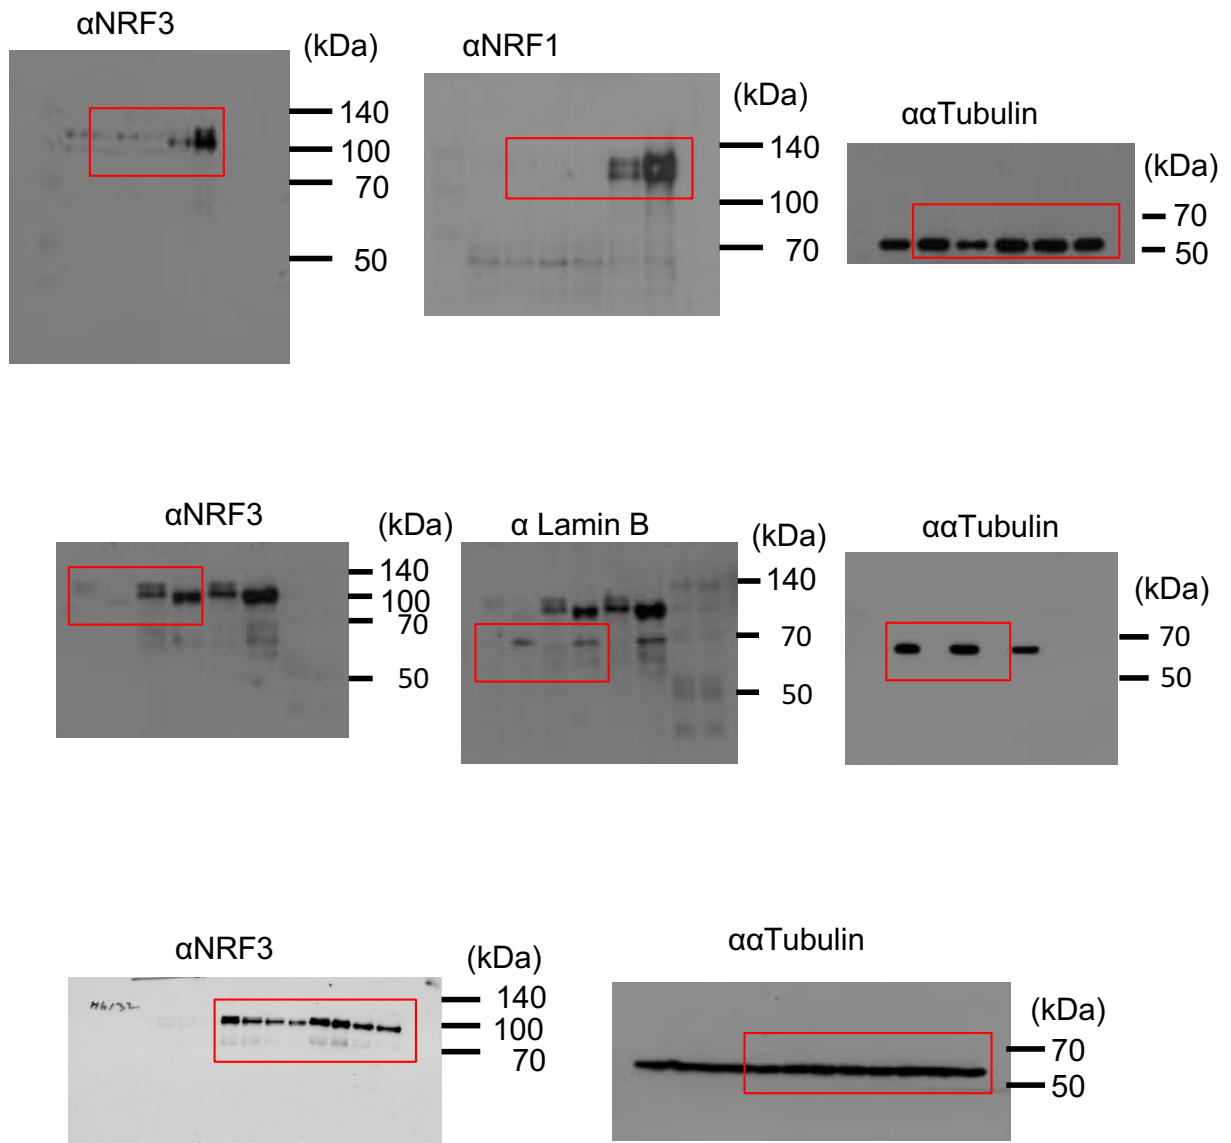

**Figure S6** (C) Full-length western blots for figure 3A, C and E. The line box regions are the cropped portion of the blot shown in the main figure.

D

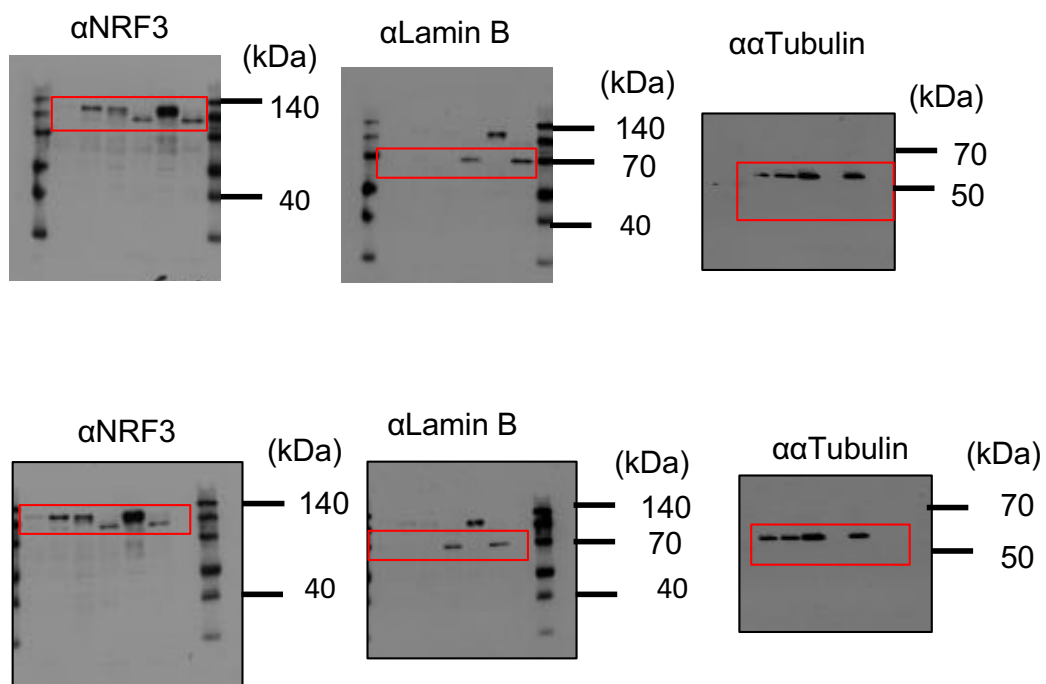

**Figure S6 (D)** Full-length western blots for figure 4 A and B. The line box regions are the cropped portion of the blot shown in the main figure.

E

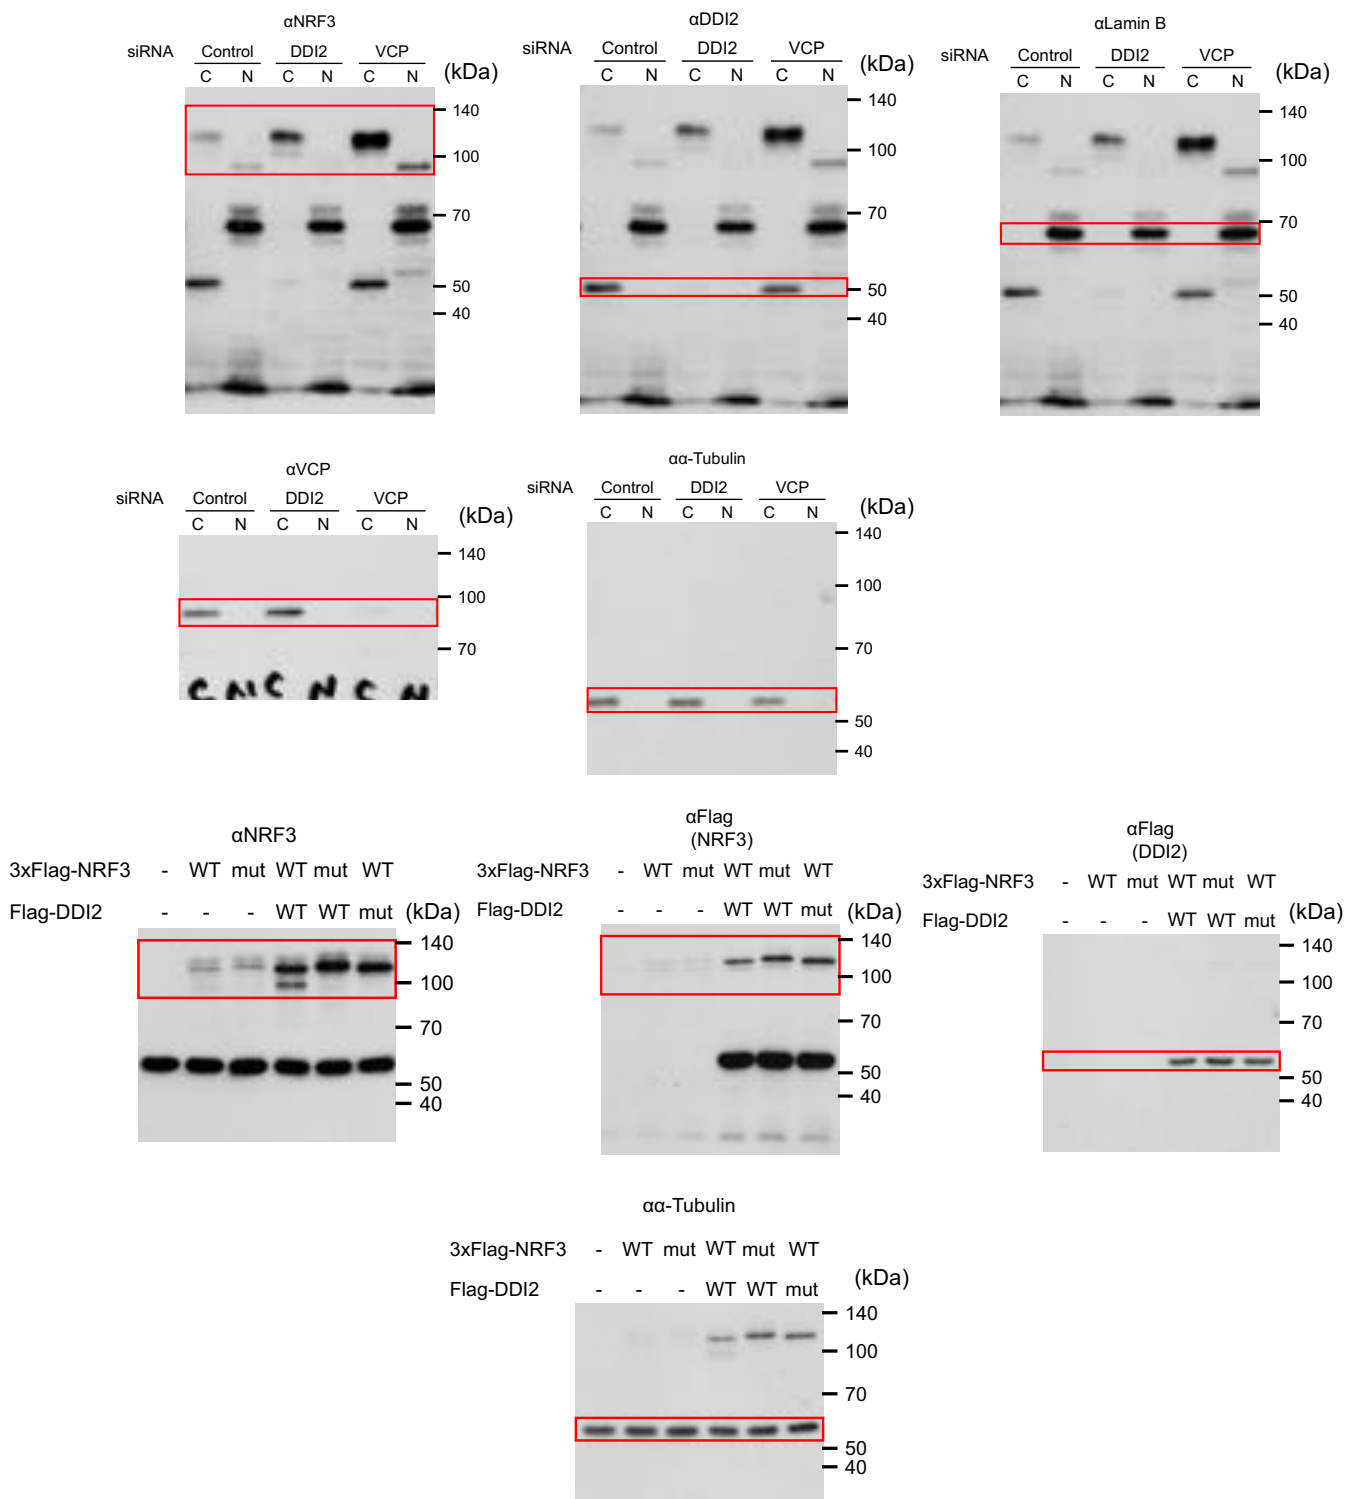

**Figure S6 (E)** Full-length western blots for figure 4 D and E. The line box regions are the cropped portion of the blot shown in the main figure.

F

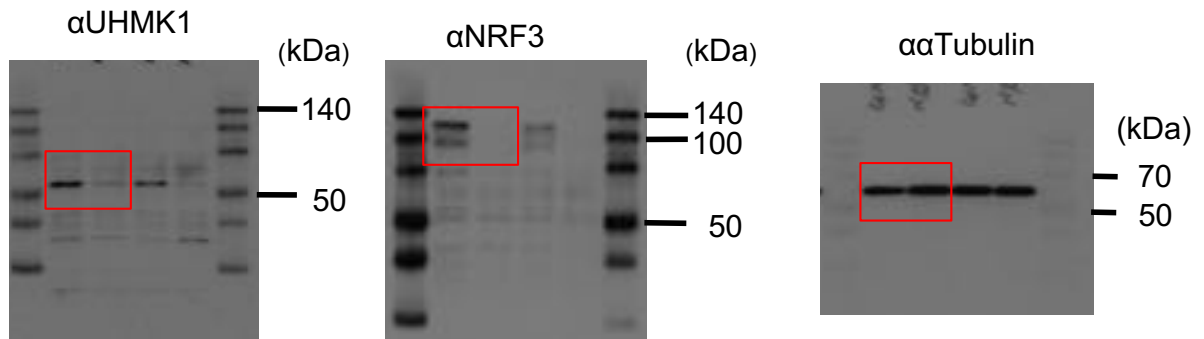

**Figure S6 (F)** Full-length western blots for figure 5C . The line box regions are the cropped portion of the blot shown in the main figure.

G

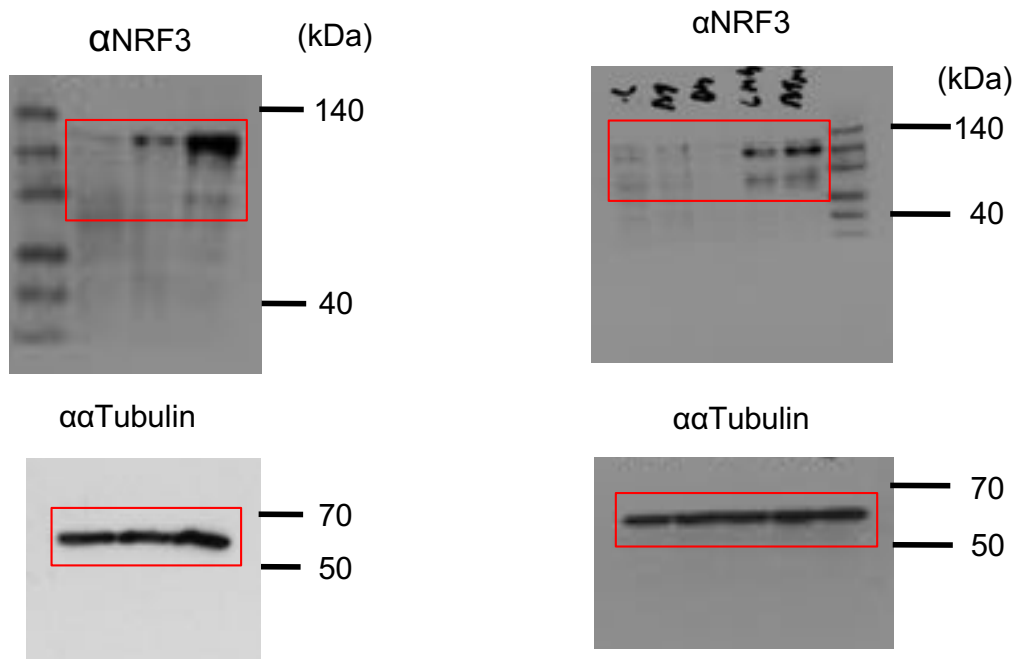

**Figure S6 (G)** Full-length western blots for figure S1 A and C. The line box regions are the cropped portion of the blot shown in the main figure.

H

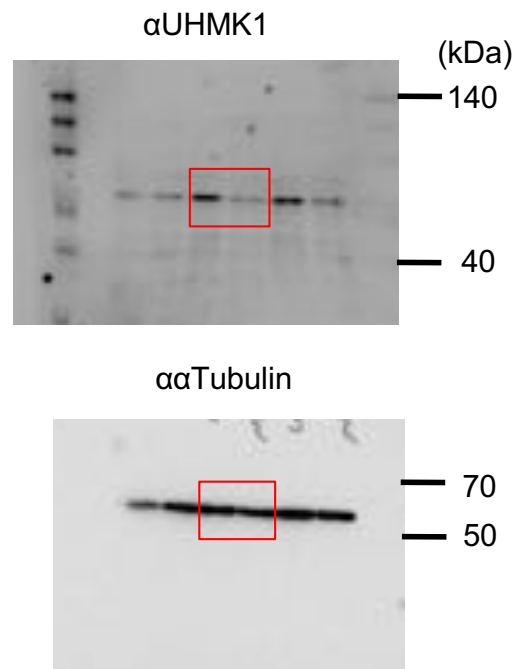

**Figure S6** (H) Full-length western blots for figure S2 B. The line box regions are the cropped portion of the blot shown in the main figure.

I

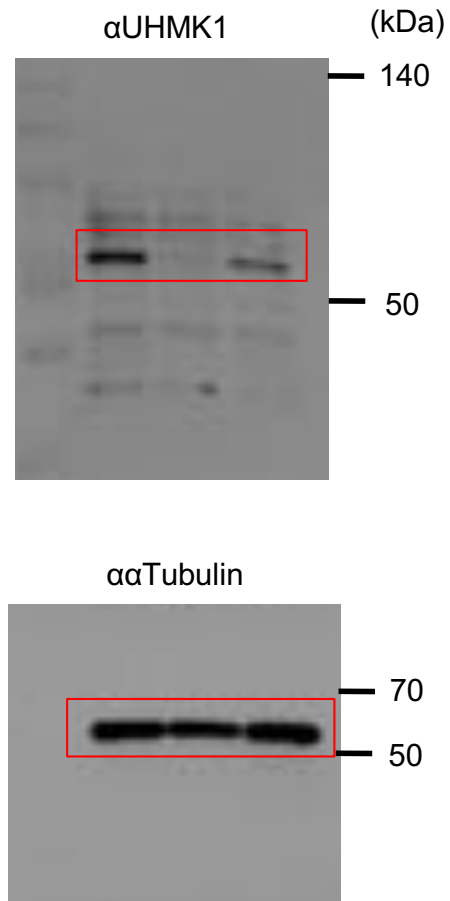

**Figure S6** (I) Full-length western blots for figure S3 B. The line box regions are the cropped portion of the blot shown in the main figure.

J

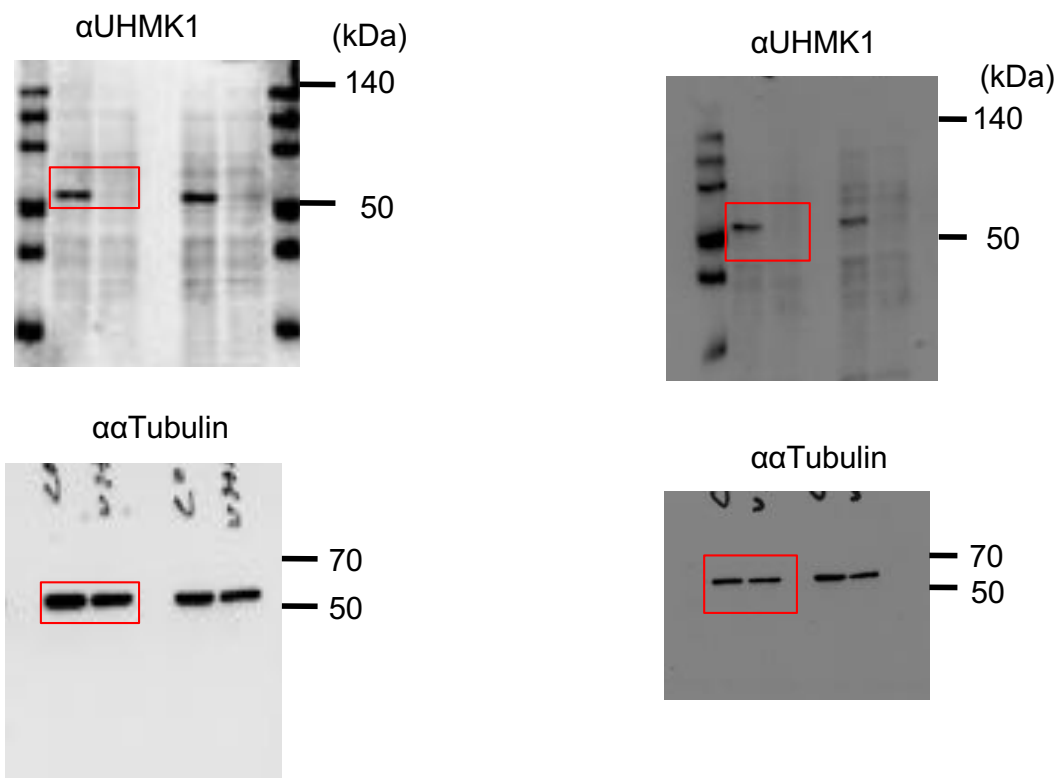

**Figure S6 (J)** Full-length western blots for figure S4 B. The line box regions are the cropped portion of the blot shown in the main figure.



K

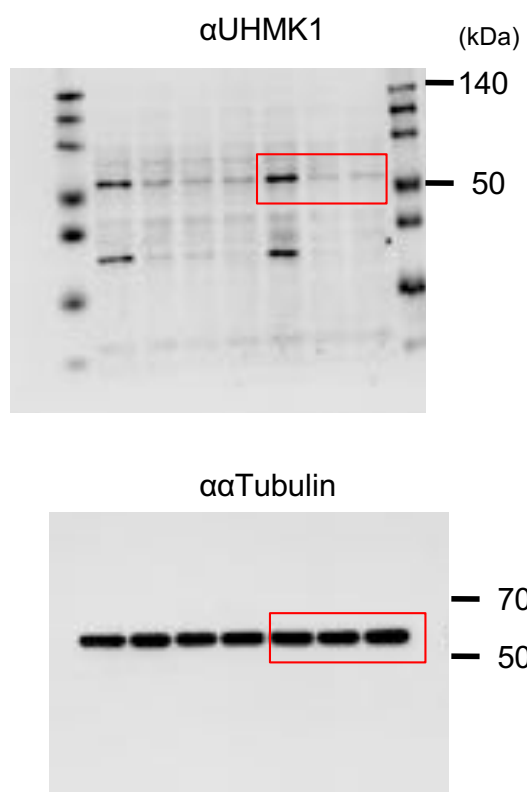

**Figure S6 (K)** Full-length western blots for figure S5. The line box regions are the cropped portion of the blot shown in the main figure.

**Supplementary Table 1.** Identification of NRF3-associated proteins by mass spectrometry.

| Gene Symbol   | Score | Protein Name/Description                        |
|---------------|-------|-------------------------------------------------|
| <i>SKP1</i>   | 3     | S-phase kinase-associated protein 1             |
| <i>VCP</i>    | 4     | transitional endoplasmic reticulum ATPase       |
| <i>USP15</i>  | 4     | ubiquitin carboxyl-terminal hydrolase 15        |
| <i>HCFC1</i>  | 4     | host cell factor 1                              |
| <i>PSMA1</i>  | 4     | Proteasome subunit alpha type-1                 |
| <i>PSMA2</i>  | 4     | Proteasome subunit alpha type-2                 |
| <i>PSMA4</i>  | 4     | Proteasome subunit alpha type-4                 |
| <i>PSMA6</i>  | 4     | Proteasome subunit alpha type-6                 |
| <i>PSMA7</i>  | 3     | Proteasome subunit alpha type-7                 |
| <i>PSMC1</i>  | 4     | 26S Proteasome regulatory subunit 4             |
| <i>PSMC2</i>  | 4     | 26S Proteasome regulatory subunit 7             |
| <i>PSMC3</i>  | 4     | 26S Proteasome regulatory subunit 6A            |
| <i>PSMC6</i>  | 4     | 26S Proteasome regulatory subunit 10B           |
| <i>PSMD11</i> | 4     | 26S Proteasome non-ATPase regulatory subunit 11 |
| <i>PSMD12</i> | 4     | 26S Proteasome non-ATPase regulatory subunit 12 |
| <i>PSMD2</i>  | 3     | 26S Proteasome non-ATPase regulatory subunit 2  |
| <i>PSMD6</i>  | 4     | 26S Proteasome non-ATPase regulatory subunit 6  |
| <i>PSMD8</i>  | 4     | 26S Proteasome non-ATPase regulatory subunit 8  |
